# Supplementary material for: Measurable residual disease-guided therapy in intermediate-risk acute myeloid leukemia patients is a valuable strategy in reducing allogeneic transplantation without negatively affecting survival
Source: PubMed Central journal article supplement — Haematologica. 2023 Apr 6;108(10):2794–8. doi: 10.3324/haematol.2022.282639 (PMC10542837; doi:10.3324/haematol.2022.282639), 2023-04-06
Supplement: 2022_282639_TETTERO_SUPPL.pdf [file 2022_282639_TETTERO_SUPPL.pdf]

# Measurable residual disease-guided therapy in intermediate-risk acute myeloid leukemia patients is a valuable strategy in reducing allogeneic transplantation without negatively affecting survival

Jesse M. Tettero,<sup>1,2</sup> Lok Lam Ngai,<sup>1,2</sup> Costa Bachas,<sup>1,2</sup> Dimitri A. Breems,<sup>3</sup> Thomas Fischer,<sup>4</sup> Bjorn T. Gjertsen,<sup>5</sup> Patrycja Gradowska,<sup>6</sup> Laimonas Griskevicius,<sup>7</sup> Jeroen J.W.M. Janssen,<sup>1,2</sup> Gunnar Juliusson,<sup>8</sup> Johan Maertens,<sup>9</sup> Markus G. Manz,<sup>10,11</sup> Thomas Pabst,<sup>11,12</sup> Jakob Passweg,<sup>11,13</sup> Kimmo Porkka,<sup>14</sup> Peter J.M. Valk,<sup>15</sup> Bob Löwenberg,<sup>15</sup> Gert J. Ossenkoppele<sup>1,2</sup> and Jacqueline Cloos<sup>1,2</sup>

<sup>1</sup>Amsterdam University Medical Centers, Location VUmc, Amsterdam, The Netherlands; <sup>2</sup>Imaging and Biomarkers, Cancer Center Amsterdam, Amsterdam, The Netherlands; <sup>3</sup>Ziekenhuis Netwerk Antwerpen, Antwerp, Belgium; <sup>4</sup>Otto von Guericke University Hospital Magdeburg, Magdeburg, Germany; <sup>5</sup>Haukeland University Hospital, Bergen, Norway; <sup>6</sup>Dutch-Belgian Hemato-Oncology Cooperative Group Data Center-Erasmus MC Cancer Institute, Rotterdam, The Netherlands; <sup>7</sup>Vilnius University Hospital Santaros Klinikos and Vilnius University, Vilnius, Lithuania; <sup>8</sup>Skanes University Hospital, Lund, Sweden; <sup>9</sup>University Hospital Gasthuisberg, Leuven, Belgium; <sup>10</sup>University Hospital, Zurich, Switzerland; <sup>11</sup>Swiss Group for Clinical Cancer Research (SAKK), Bern, Switzerland; <sup>12</sup>Department of Medical Oncology, Inselspital; University Hospital, Bern, Switzerland; <sup>13</sup>University Hospital, Basel, Switzerland; <sup>14</sup>Helsinki University Hospital Cancer Center, Helsinki, Finland and <sup>15</sup>Erasmus University Medical Center (MC) and Erasmus MC Cancer Institute, Rotterdam, The Netherlands

Correspondence:

J. CLOOS - j.cloos@amsterdamumc.nl

<https://doi.org/10.3324/haematol.2022.282639>

Lettero et al. Supplementary table and figures

|                                                    |                                  | No. of patients evaluated | MRD-unguided group (%) | MRD-guided group (%) | P-value |
|----------------------------------------------------|----------------------------------|---------------------------|------------------------|----------------------|---------|
| <b>Total</b>                                       |                                  |                           | 110 (100)              | 110 (100)            |         |
| <b>Trial code</b>                                  | HO42a                            |                           | 40 (36)                | 0 (0)                |         |
|                                                    | HO81                             |                           | 7 (6)                  | 0 (0)                |         |
|                                                    | HO92                             |                           | 5 (5)                  | 0 (0)                |         |
|                                                    | HO102                            |                           | 58 (53)                | 0 (0)                |         |
|                                                    | HO132                            |                           | 0 (0)                  | 110 (100)            |         |
| <b>Male sex</b>                                    |                                  |                           | 53 (48)                | 56 (51)              | 0.686   |
| <b>Age (years)</b>                                 | ≤45                              |                           | 30 (27)                | 42 (38)              | 0.223   |
|                                                    | 46-60                            |                           | 59 (54)                | 51 (46)              |         |
|                                                    | >60                              |                           | 21 (19)                | 17 (16)              |         |
| <b>WHO/ECOG performance status</b>                 | 0                                |                           | 60 (55)                | 61 (56)              | 0.990   |
|                                                    | 1                                |                           | 46 (42)                | 45 (41)              |         |
|                                                    | 2                                |                           | 4 (4)                  | 4 (4)                |         |
| <b>Diagnostic subgroup</b>                         | AML                              |                           | 101 (92)               | 103 (94)             | 0.604   |
|                                                    | High-risk RAEB                   |                           | 9 (8)                  | 7 (6)                |         |
| <b>AML type</b>                                    | De novo                          |                           | 94 (86)                | 100 (91)             | 0.247   |
|                                                    | sAML                             |                           | 13 (12)                | 6 (6)                |         |
|                                                    | tAML                             |                           | 3 (3)                  | 4 (4)                |         |
| <b>WBC, x 10<sup>9</sup> /L</b>                    | ≤20                              |                           | 74 (67)                | 71 (65)              | 0.129   |
|                                                    | 20-100                           |                           | 33 (30)                | 29 (26)              |         |
|                                                    | >100                             |                           | 3 (3)                  | 10 (9)               |         |
| <b>Cytogenetics</b>                                | CN-X-Y                           | 215                       | 94 (89)                | 76 (70)              | 0.003*  |
|                                                    | CA rest                          |                           | 11 (10)                | 30 (28)              |         |
|                                                    | Monosomal karyotype <sup>#</sup> |                           | 1 (1)                  | 3 (3)                |         |
| <b>Sub classification of normal karyotype (NK)</b> | NPM1-neg FLT3-ITD-neg            | 170                       | 38 (40)                | 31 (41)              | 0.471   |
|                                                    | NPM1-neg FLT3-ITD-pos            |                           | 13 (14)                | 5 (7)                |         |
|                                                    | NPM1-pos FLT3-ITD-pos            |                           | 35 (37)                | 32 (42)              |         |
|                                                    | NPM1/FLT3-ITD-unknown            |                           | 8 (9)                  | 8 (11)               |         |
| <b>Gene mutations</b>                              | NPM1-pos                         | 200                       | 37 (34)                | 36 (33)              | 0.895   |
|                                                    | FLT3-ITD-pos                     | 198                       | 50 (46)                | 42 (38)              | 0.544   |
|                                                    | NPM1-neg FLT3-ITD-neg            | 198                       | 50 (46)                | 56 (51)              | 0.293   |
|                                                    | NPM1-neg FLT3-ITD-pos            |                           | 14 (13)                | 6 (6)                |         |
|                                                    | NPM1-pos FLT3-ITD-pos            |                           | 36 (33)                | 36 (33)              |         |
|                                                    | IDH1-pos                         | 183                       | 11 (13)                | 11 (11)              | 0.722   |
|                                                    | IDH2-pos                         | 184                       | 17 (20)                | 16 (16)              | 0.544   |
| <b>MRD status after cycle II</b>                   | Neg                              |                           | 89 (81)                | 77 (70)              | 0.060   |
|                                                    | Pos                              |                           | 21 (19)                | 33 (30)              |         |
| <b>Consolidation therapy received</b>              | Cycle 3                          |                           | 18 (16)                | 13 (12)              | 0.772   |
|                                                    | Auto-SCT                         |                           | 21 (19)                | 24 (22)              |         |
|                                                    | Allo-SCT                         |                           | 57 (52)                | 60 (55)              |         |
|                                                    | None                             |                           | 14 (13)                | 13 (12)              |         |

**Table S1: Characteristics of MRD-guided and MRD-unguided group.** Not shown is ASXL1, CEPBA, RUNX1, TP53, t(8;21) and inv(16) because all patients were negative. <sup>#</sup>All patients with a monosomal karyotype had a t(9;11)(p21.3;q23.3) simultaneously present, which takes precedence over

rare, concurrent adverse-risk gene mutations, making these patients intermediate risk according to the ELN-2017 classification. CA, abnormal cytogenetics; CN, normal cytogenetics; ECOG, Eastern Cooperative Oncology Group; neg, negative; pos, positive; sAML, secondary AML (after myelodysplastic syndrome and antecedent hematologic disease); tAML, therapy-related AML (in case of previous chemotherapy or radiotherapy); WHO, World Health Organization. Statistical differences are assessed using Pearson Chi-Square test or Fisher's Exact Test in categorical variables, and the Mann-Whitney U test was used to analyze continuous variables.

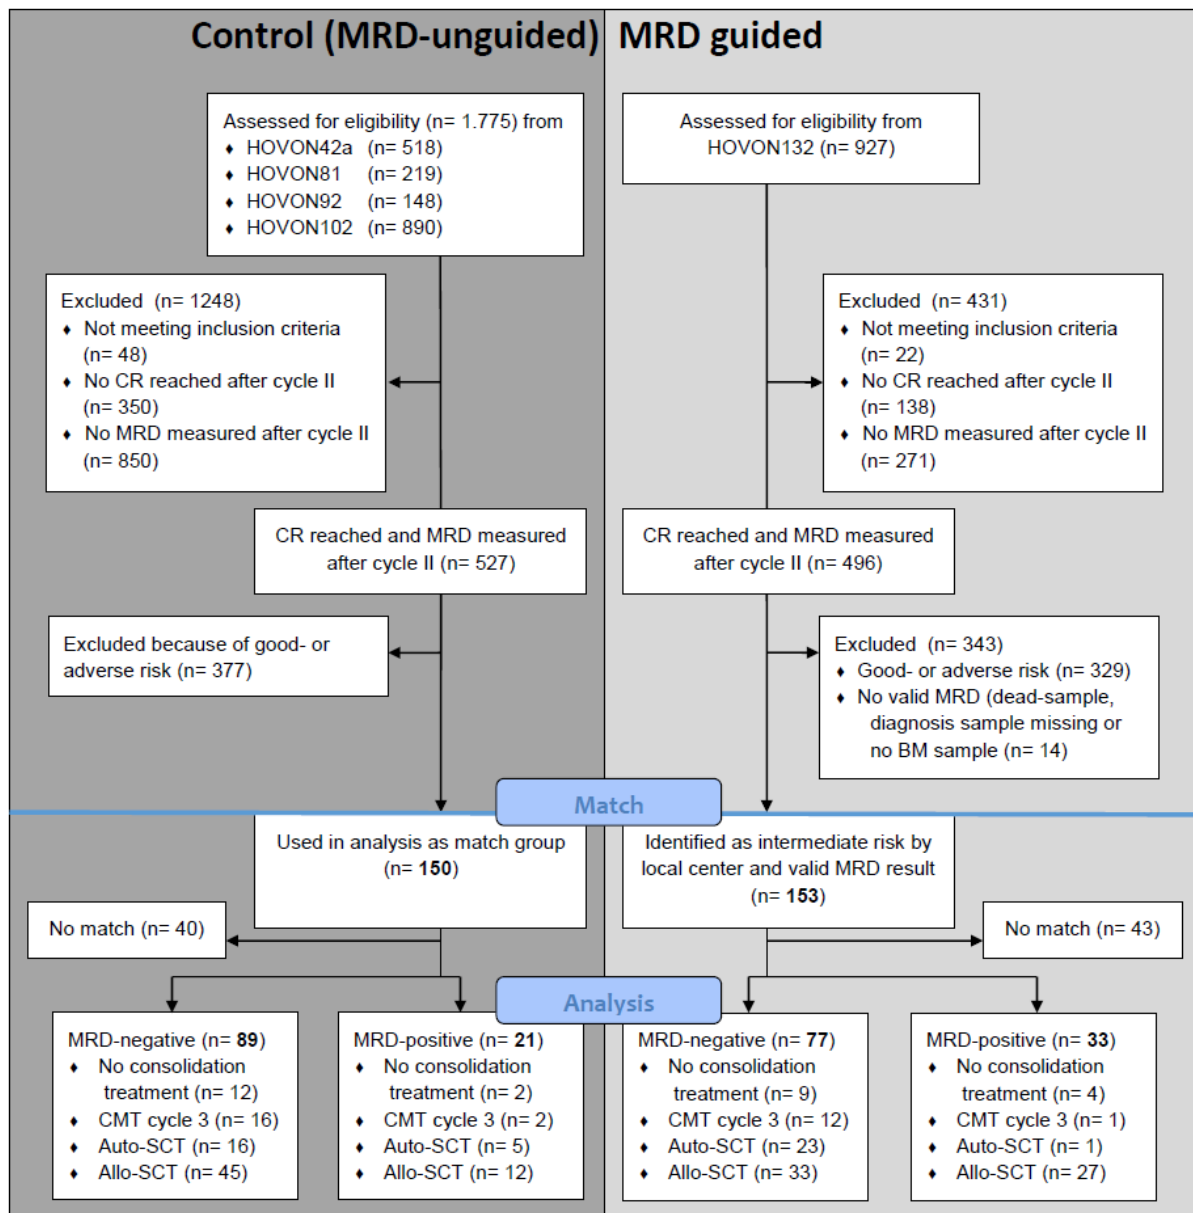

**Figure S1. Consort diagram.** Four studies were used for the matched MRD-unguided group (left side) and one study for the MRD guided group (right side). After matching, 110 patients remained in both groups.

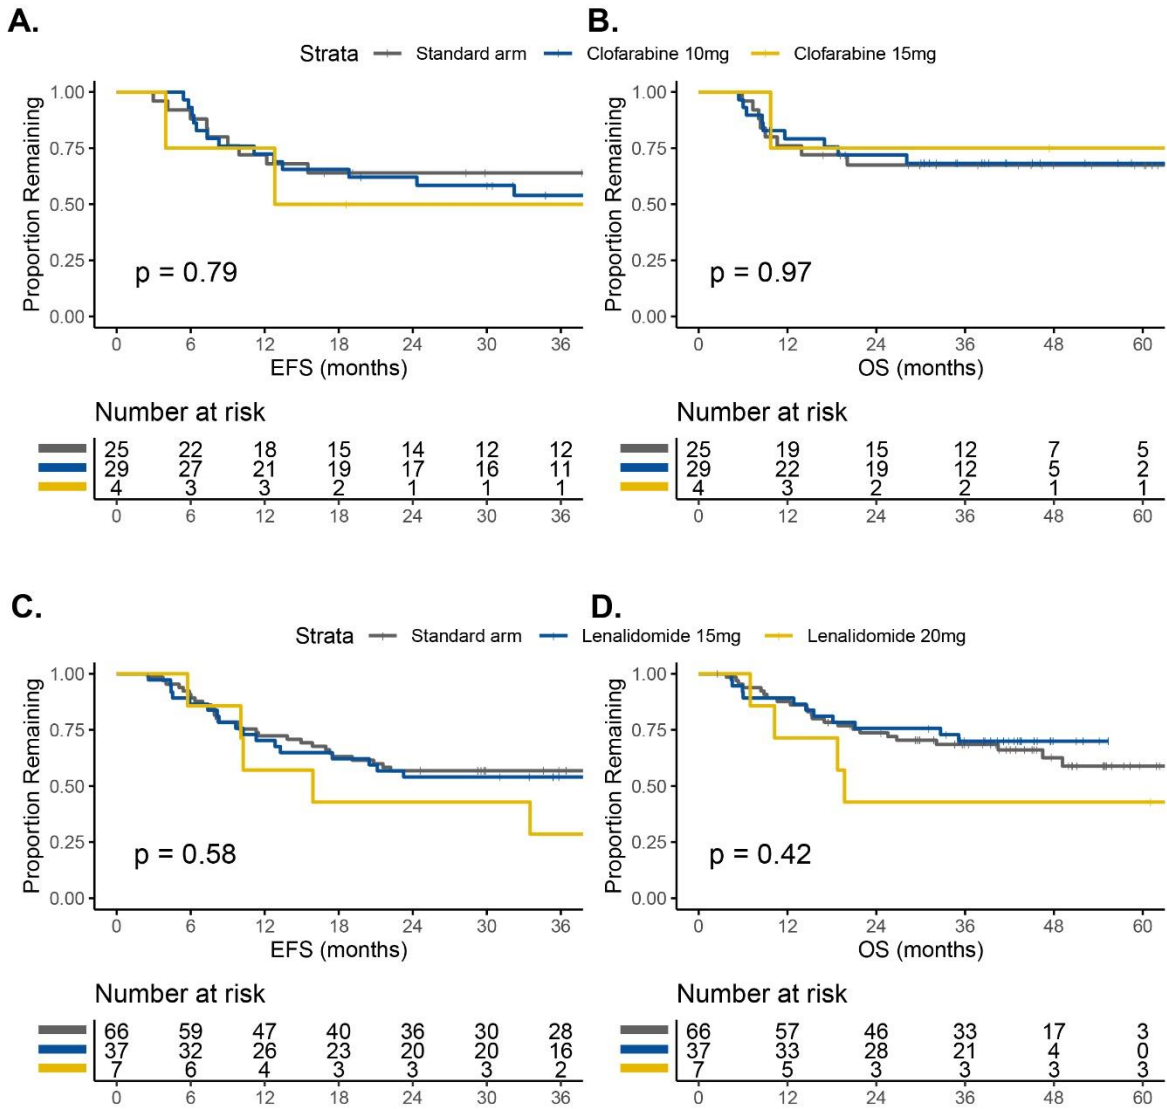

**Figure S2: Event-free survival (EFS) and overall survival (OS) stratified by experimental agent randomization in the HO102 (top) and the HO132 study (bottom).** The EFS and OS from the HO81 and HO92 studies were also not significantly different, but are not shown since only 7 and 5 patients are included, respectively. **(A)** EFS for patients included from the HO102 trial, stratified by randomization. **(B)** OS for patients included from the HO102 trial, stratified by randomization. **(C)** EFS for patients included from the HO132 trial, stratified by randomization. **(D)** OS for patients from HO132 trial, stratified by treatment arm.
